# Supplementary material for: Oxidative stress enhances the therapeutic action of a respiratory inhibitor in MYC‐driven lymphoma
Source: PubMed Central journal article supplement (PMC10245039; doi:10.15252/emmm.202216910), 2023-05-09
Supplement: EMMM-15-e16910-s009.pdf [file EMMM-15-e16910-s009.pdf]

**Oxidative stress enhances the therapeutic action of a respiratory inhibitor  
in MYC-driven lymphoma**

Giulio Donati *et al.* 2023

**APPENDIX**

**Table of contents:**

|                    |   |
|--------------------|---|
| Appendix Figure S1 | 2 |
| Appendix Figure S2 | 3 |
| Appendix Figure S3 | 4 |
| Appendix Figure S4 | 6 |
| Appendix Figure S5 | 7 |

**A**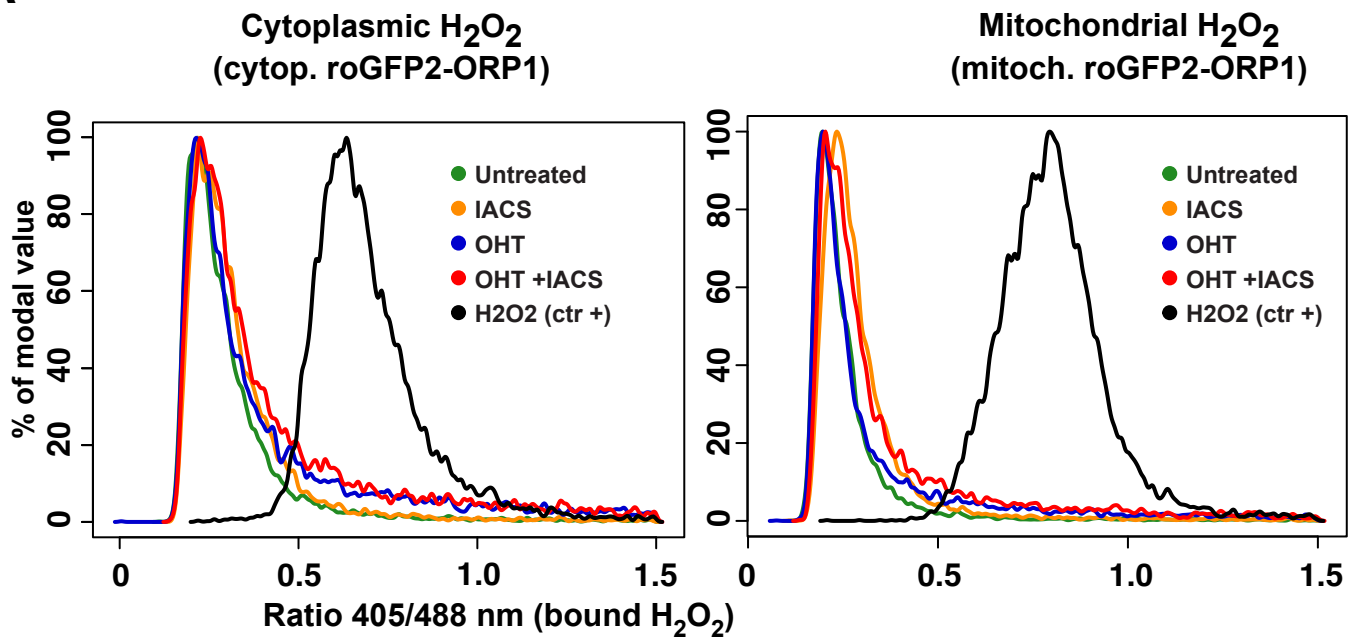**B**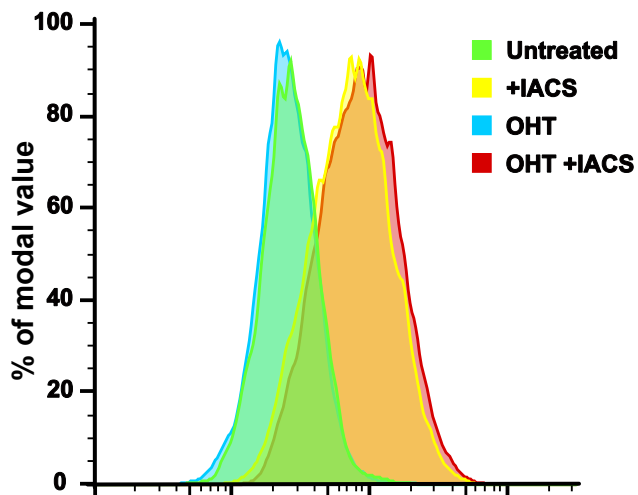

**Appendix Figure S1. MycER activation causes ROS production and induces an oxidative stress response.** (A) Representative distribution plots for the 405/488 nm fluorescence ratio with the cytoplasmic (left) and mitochondrial (right) roGFP2-ORP1 biosensor in OHT- and/or IACS-010759-treated FL<sup>MycER</sup> cells (as in Figure 1B). As a positive control (ctr +), cells were treated with 200  $\mu$ M H<sub>2</sub>O<sub>2</sub> immediately before cytometric analysis. (B) Representative flow cytometry of superoxide quantification by dihydroethidium staining of FL<sup>MycER</sup> cells, primed with 100 nM OHT and treated with 135 nM IACS-010759 for 24h where indicated (as in Figure 1C).

**A**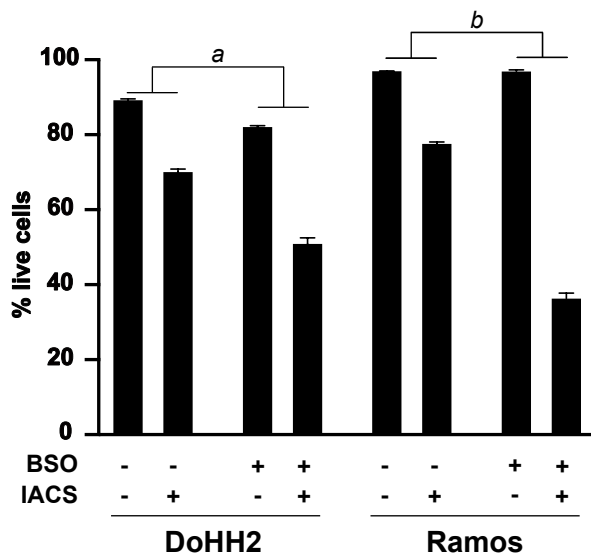

|          | F <sub>1,8</sub> | p-value  |
|----------|------------------|----------|
| <i>a</i> | 125              | 3.65E-06 |
| <i>b</i> | 1799             | 1.05E-10 |

**B**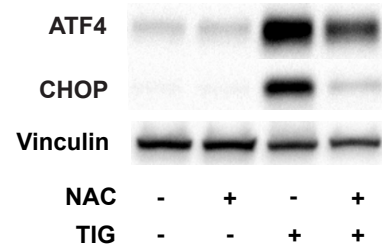

**Appendix Figure S2. Disruption of redox homeostasis by IACS-010759 induces cell death in Myc-overexpressing cells.** (A) Representative Cell viability of DoHH2 and Ramos lymphoma cells treated where indicated with 135 nM IACS-010759 for 40 hours, either alone or in the presence of 50  $\mu$ M BSO. Error bars: SD (n=3). The table shows the two-way ANOVA analysis for IACS-010759-induced cell death in the presence and absence of BSO. (B) Immunoblot on lysates from FL<sup>MycER</sup> cells treated with 5  $\mu$ M tigeicycline (TIG) for 48 hours, in the presence or absence of 10 mM NAC, as indicated.

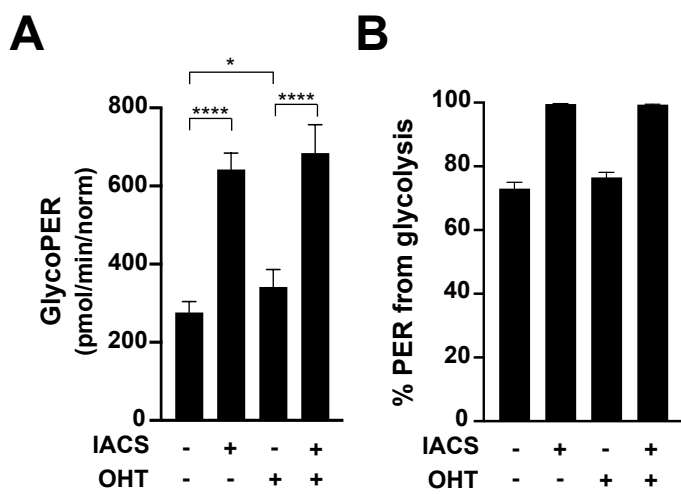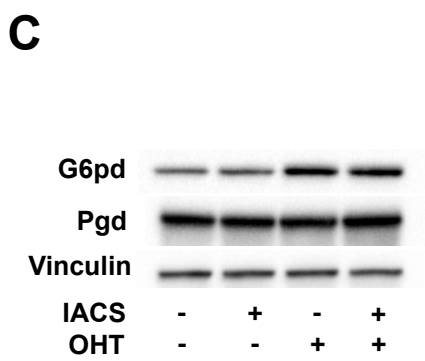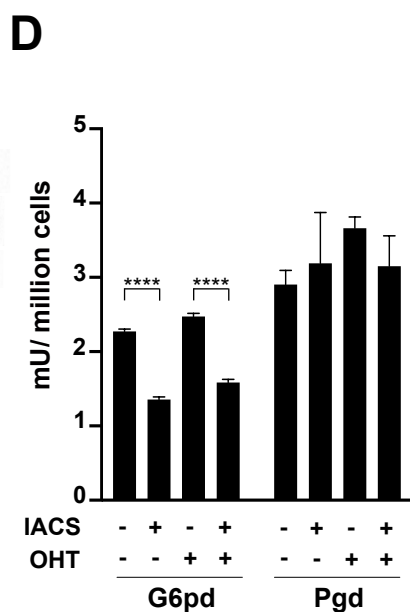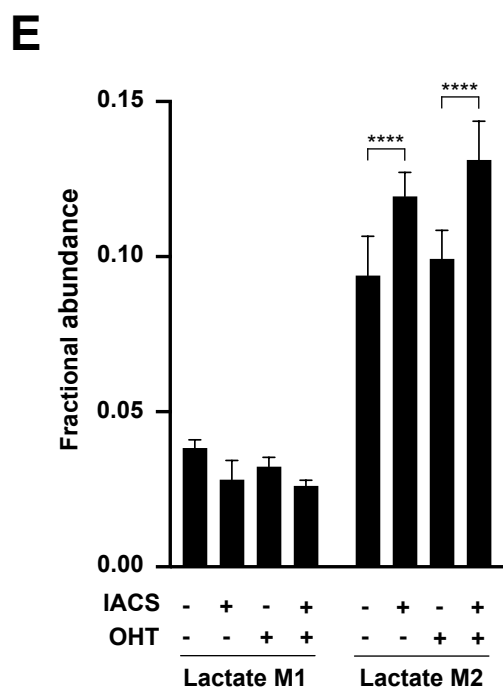

**F**

|         | two-way ANOVA            | DF | SS       | MS       | F      | p-value  |
|---------|--------------------------|----|----------|----------|--------|----------|
| Fig. 3E | Between treatments       | 7  | 5916.9   | 845.27   | 16.45  | 5.52E-10 |
|         | IACS                     | 3  | 4423.4   | 1474.47  | 28.70  | 4.57E-10 |
|         | DHEA                     | 1  | 624.5    | 624.5    | 12.16  | 0.0012   |
|         | Interaction              | 3  | 869.0    | 289.67   | 5.64   | 0.0025   |
|         | Error                    | 40 | 2055.0   | 51375    |        |          |
|         | IACS selectivity for OHT | 1  | 251.72   | 251.72   | 4.90   | 0.033    |
| Fig. 3F | Between treatments       | 7  | 9018     | 1288     | 36     | 2.61E-15 |
|         | IACS                     | 3  | 5369     | 1790     | 50     | 1.38E-13 |
|         | 6AN                      | 1  | 1978     | 1978     | 55     | 4.78E-09 |
|         | Interaction              | 3  | 1671     | 557      | 16     | 7.49E-07 |
|         | Error                    | 40 | 1434     | 36       |        |          |
|         | IACS selectivity for OHT | 1  | 407      | 407      | 11     | 1.68E-03 |
| Fig. 3G | Between treatments       | 7  | 39001.4  | 5571.63  | 106.27 | 8.39E-24 |
|         | IACS                     | 3  | 11905.98 | 3968.7   | 75.70  | 1.53E-16 |
|         | 2DG                      | 1  | 19043.14 | 19043.14 | 363.21 | 1.12E-21 |
|         | Interaction              | 3  | 8052.3   | 2684.1   | 51.19  | 1.14E-08 |
|         | Error                    | 40 | 2097.2   | 52.43    |        |          |
|         | IACS selectivity for OHT | 1  | 2.215    | 2.215    | 0.0422 | 0.838    |

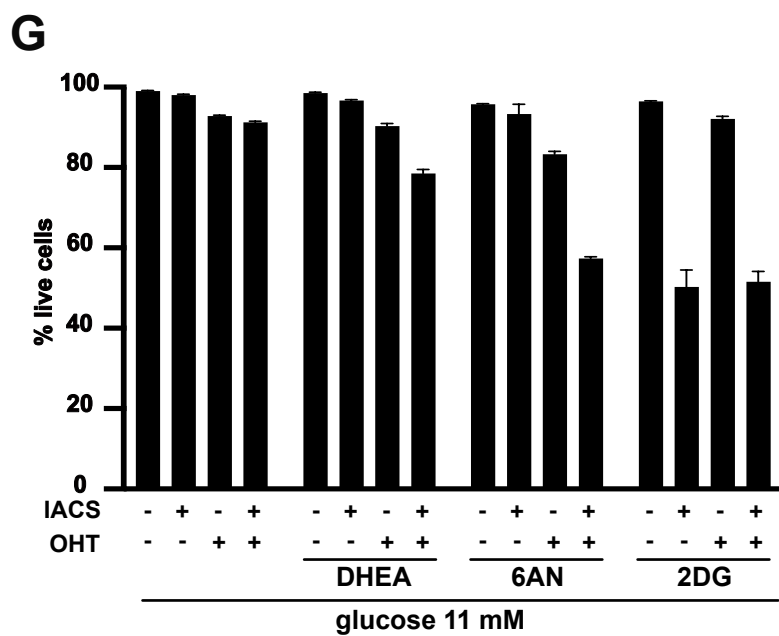

**H**

|   | F <sub>1,8</sub> | p-value  |
|---|------------------|----------|
| a | 2661             | 2.21E-11 |
| b | 5177             | 1.55E-12 |
| c | 327              | 9.00E-08 |
| d | 140              | 2.42E-06 |

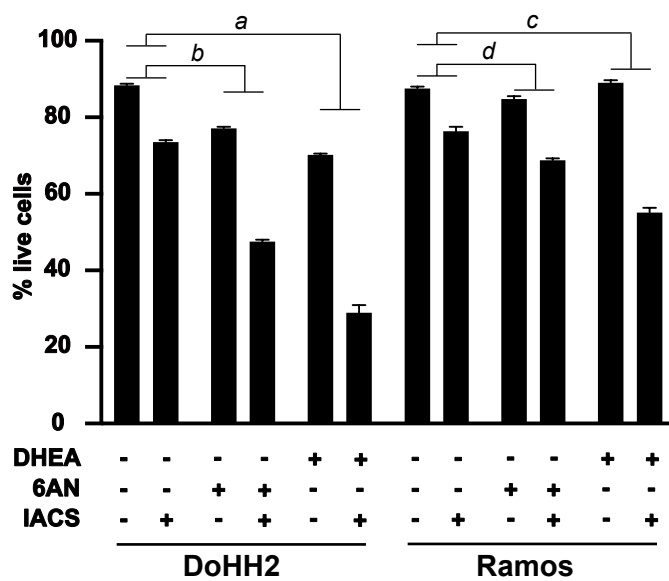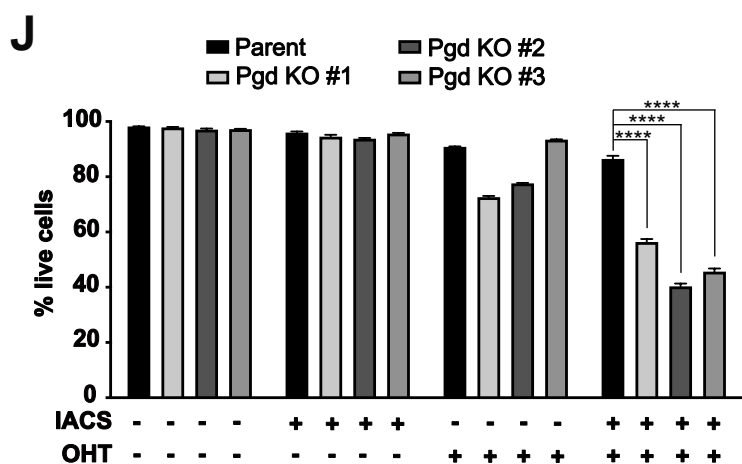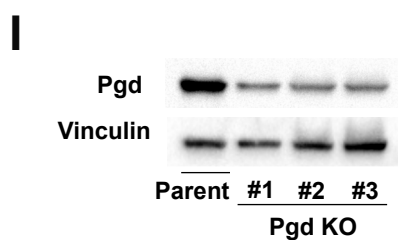

**Appendix Figure S3. The pentose phosphate pathway protects MYC-overexpressing cells from IACS-010759-induced toxicity.** (A) Basal glycolytic rate (glycoPER), calculated from the proton efflux rate (PER) of FL<sup>MycER</sup> cells, primed with 100 nM OHT (48h) and/or treated with 135 nM IACS-010759 for 24 hours, as indicated. \*  $p \leq 0.05$ ; \*\*\*\*  $p \leq 0.0001$ . (B) Percentage of PER from glycolysis (as opposed to mitochondrial respiration) on the same samples shown in (A). (C) Immunoblot analysis and (D) Enzymatic activity assays for G6pd and Pgd after 24 hours of IACS-010759 treatment. (E) Fractional abundance of <sup>13</sup>C-labeled lactate, the endpoint of the anaerobic glycolytic pathway, after addition of [1,2-<sup>13</sup>C]glucose to FL<sup>MycER</sup> cells treated as in (A). (F) Two-way ANOVA analysis of the data shown in Figure 3E, 3F and 3G, as indicated. A test for the selective cytotoxicity of IACS-010759 toward OHT-treated FL<sup>MycER</sup> cells is reported in red at the end of each section for the co-treatments with DHEA, 6AN and 2DG, respectively. (G) Cell viability FL<sup>MycER</sup> cells grown in medium containing 11 mM glucose after 40 hours of IACS-010759 treatment in the presence of 50  $\mu$ M dehydroepiandrosterone (DHEA), 10  $\mu$ M 6-aminonicotinamide (6AN) or 1 mM 2-deoxyglucose (2DG). Error bars: SD (n=3). (H) Immunoblot on lysates from parental FL<sup>MycER</sup> cells and clones derived after CRISPR-Cas9 mediated *Pgd* gene knockout. (I) Cell viability of FL<sup>MycER</sup> cells and the *Pgd* KO clones shown in (H) primed with OHT and treated for 40h with 135 nM IACS-010759. Error bars: SD (n=3). (J) Cell viability of DoHH2 and Ramos lymphoma cells treated with 135 nM IACS-010759 (40h), either alone, with 50  $\mu$ M DHEA, or with 10  $\mu$ M 6AN. Error bars: SD (n=3). The table below the graph shows the two-way ANOVA analysis of IACS-010759-induced cell death in the presence and absence of either DHEA or 6AN.

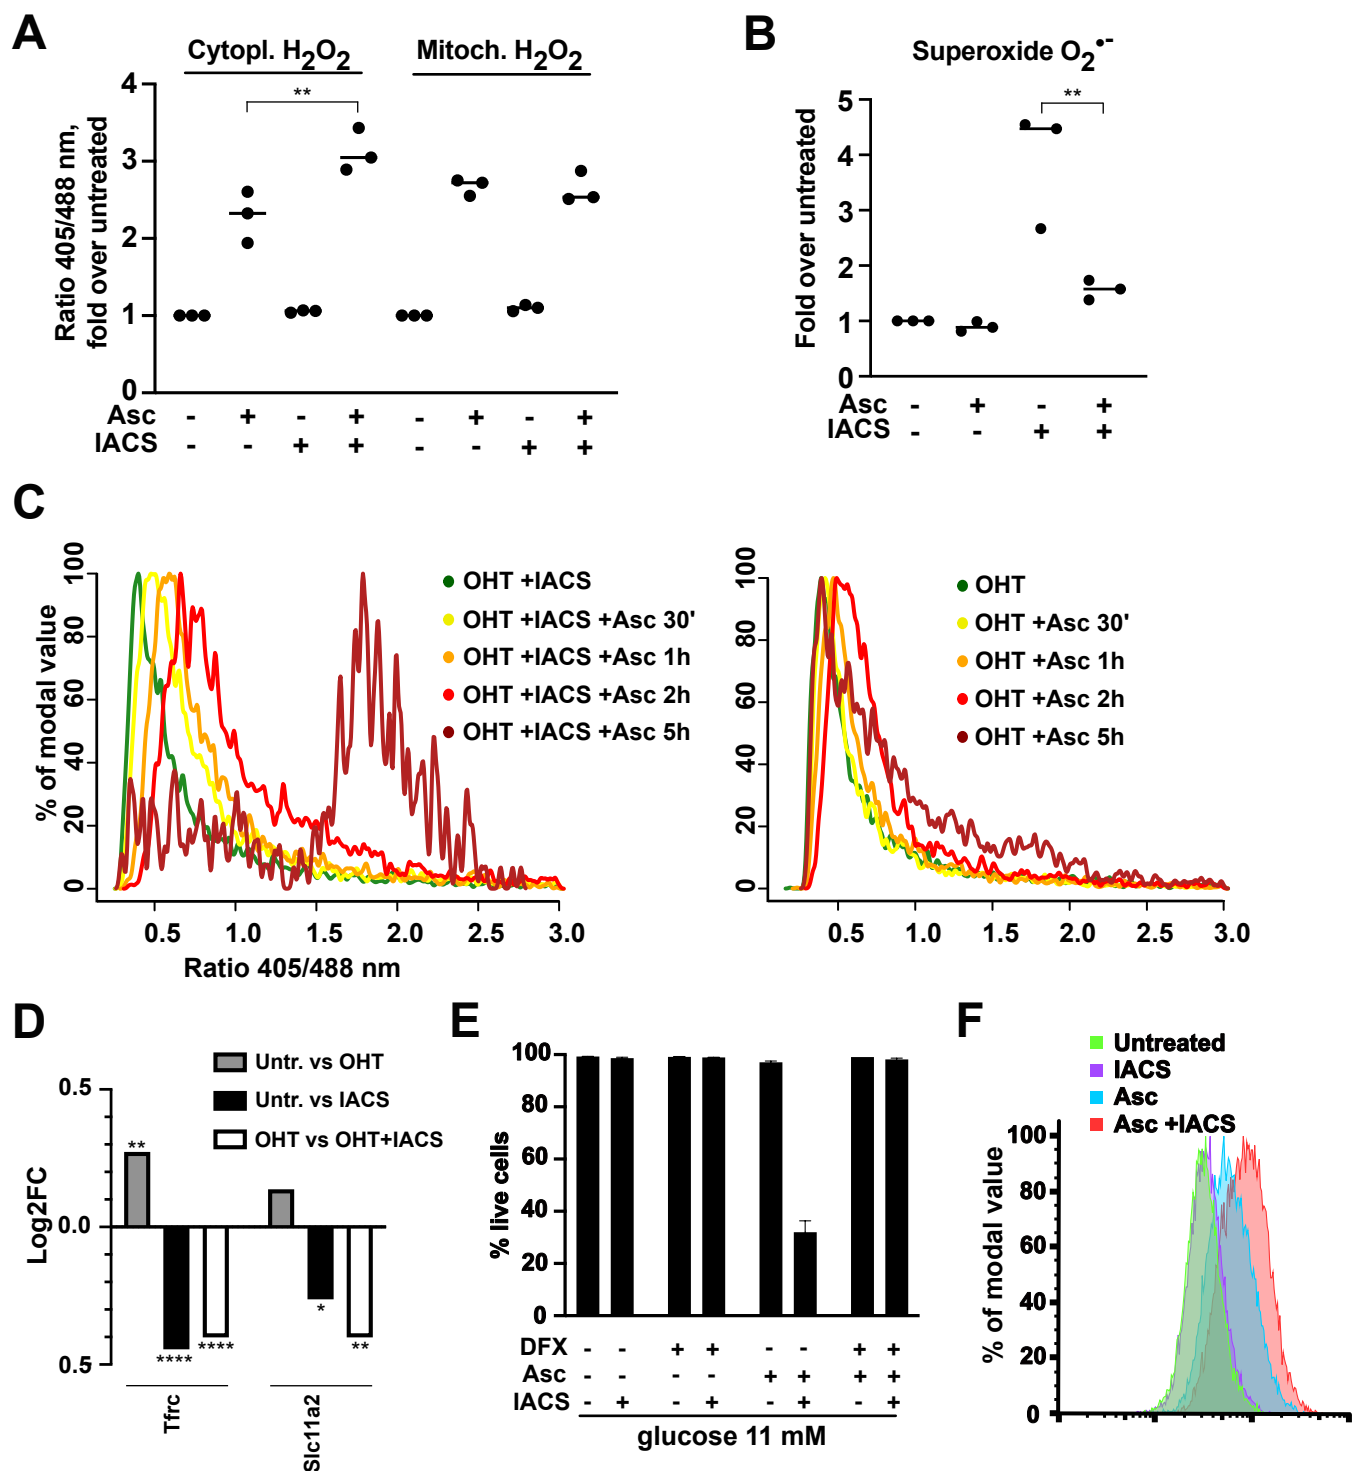

**Appendix Figure S4. Ascorbate potentiates IACS-010759-induced cell death by increasing oxidative stress.** (A)  $H_2O_2$  quantification, expressed as fold-increase of the 405/488 nm fluorescence ratio over untreated of either the cytoplasmic (left) or mitochondrial (right) roGFP2-ORP1 biosensor from FL<sup>MycER</sup> cells treated with 135 nM IACS-010759 (IACS) for 24h and/or 400  $\mu$ M ascorbate (Asc) for 3h. \*\*  $p \leq 0.01$ . (B) dihydroethidium staining quantification of superoxide anion  $O_2^{\bullet -}$  production in FL<sup>MycER</sup> cells, based on. \*  $p \leq 0.05$ . Each dot in the graphs in A and B is from an independent biological replicate and represents the average of thousands of events (single cells) in a distinct cell population, normalized to the untreated condition. (C) As Figure 4B, in OHT-primed cells. (D) Log fold change (Log<sub>2</sub>FC) of the iron-regulated mRNAs *Tfr* and *Slc11a2* in FL<sup>MycER</sup> cells with 135 nM IACS-010759, with or without pre-treatment with OHT, based on our previous RNA-seq profiles (Donati *et al.*, 2022), with the following q-values: \*  $q \leq 0.05$ ; \*\*  $q \leq 0.01$ ; \*\*\*\*  $q \leq 0.0001$ . (E) Cell viability of FL5.12 cells grown in medium containing 11 mM glucose at the end of treatment (48h IACS-010759, 6h Asc), in the presence or absence of 50  $\mu$ M deferoxamine (DFX, added 1 hour before Asc). Error bars: SD (n=3). (F) Representative flow cytometry of lipid peroxides quantification by BODIPY C11 staining of FL5.12 cells treated with 135 nM IACS for 24h and/or 400  $\mu$ M Asc for 3h where indicated (as in Figure 4D).

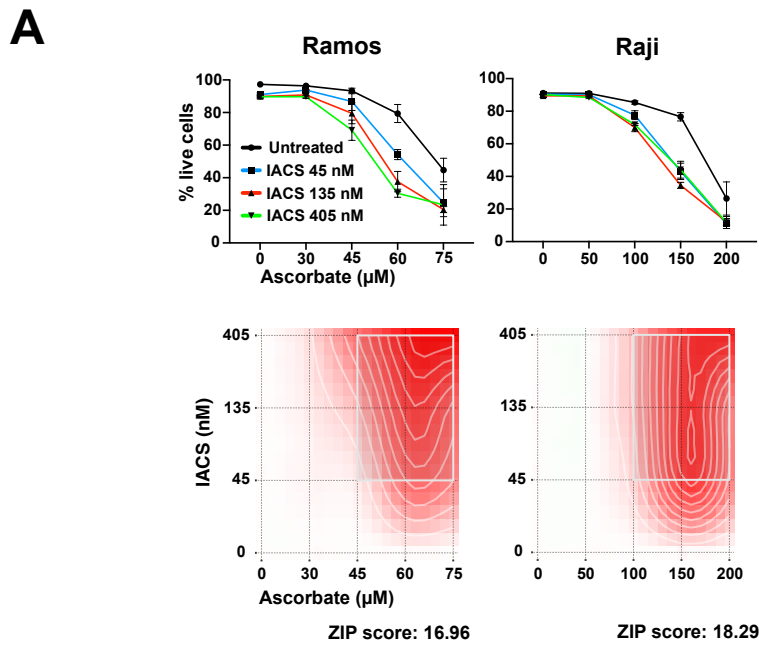

**B**

|                   | B cell neoplasm | COO | CCC    | MYC locus |
|-------------------|-----------------|-----|--------|-----------|
| <b>DoHH2</b>      | DHL             | GCB |        | transl.   |
| <b>SU-DHL-6</b>   | DHL             | GCB | BCR    | transl.   |
| <b>Karpas 422</b> | DLBCL           | GCB | OxPhos | *         |
| <b>HBL-1</b>      | DLBCL           | ABC | BCR    | wt        |
| <b>Ramos</b>      | BL              |     |        | transl.   |
| <b>Raji</b>       | BL              |     |        | transl.   |

**C**

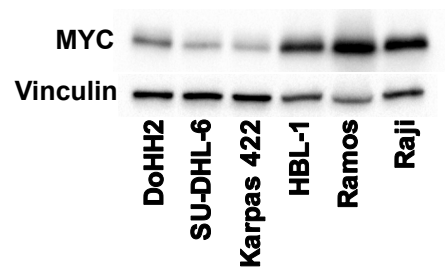

**Appendix Figure S5. Ascorbate potentiates IACS-010759-induced cell death by increasing oxidative stress.** (A) The Burkitt lymphoma cell lines Raji and Ramos were treated with the indicated concentrations of IACS-010759 and ascorbate, and cell viability determined after 24 hours. Error bars: SD (n=3). Top: live cell counts; bottom: drug interaction landscapes and synergy scores, calculated according to the ZIP model. Classification (B) and MYC protein levels (C) in the B-cell lymphoma cell lines used in this work. The table in (B) shows the B-cell neoplasm of origin, COO and CCC subtype classification (Caro *et al*, 2012; Devin *et al*, 2019; Polo *et al*, 2007; Reddy *et al*, 2017), and the status of the MYC locus (transl.: translocated). The status of the MYC locus in Karpas 422 (\*) remains uncertain, having been described as either wt or rearranged (Deng *et al*, 2018; Dyer *et al*, 1990; Farrugia *et al*, 1994); nonetheless these cells express MYC protein levels comparable to those of MYC-rearranged, DLBCL lines DoHH2 and SU-DHL-6.
